# Supplementary material for: Thyroid Collision Tumors: The Presence of the Medullary Thyroid Carcinoma Component Negatively Influences the Prognosis
Source: MDPI journal article supplement (doi:10.3390/diagnostics13020285), 2023-01-12
Supplement: s1 [file s1]

## Supplementary materials

**Table S1.** Pathological characteristics of TCTs' MTC components in relation to the histopathological prognostic features.

| Pathological characteristics | Tumor focality |          | p-value      | mETE     |           | p-value      | LVI      |           | p-value      | LNM      |          | p-value      |
|------------------------------|----------------|----------|--------------|----------|-----------|--------------|----------|-----------|--------------|----------|----------|--------------|
|                              | U (#20)        | M (#3)   |              | P (#8)   | A (#15)   |              | P (#11)  | A (#12)   |              | P (#7)   | A (#8)   |              |
| <b>Sex</b>                   |                |          |              |          |           |              |          |           |              |          |          |              |
| Male                         | 4(20%)         | 3(100%)  | <b>0.020</b> | 3(37.5%) | 4(26.7%)  | 0.657        | 5(45.5%) | 2(16.7%)  | 0.193        | 3(42.9%) | 0(0%)    | 0.077        |
| Female                       | 16(80%)        | 0(0%)    |              | 5(62.5%) | 11(73.3%) |              | 6(54.5%) | 10(83.3%) |              | 4(57.1%) | 8(100%)  |              |
| <b>Tumor size (mm)</b>       |                |          |              |          |           |              |          |           |              |          |          |              |
| < 10 mm                      | 5(25%)         | 2(66.7%) | 0.253        | 1(12.5%) | 6(40%)    | 0.107        | 1(9.1%)  | 6(50%)    | <b>0.002</b> | 0(0%)    | 4(50%)   | <b>0.006</b> |
| 10 - 40 mm                   | 9(45%)         | 0(0%)    |              | 2(25%)   | 7(46.7%)  |              | 3(27.3%) | 6(50%)    |              | 2(28.6%) | 4(50%)   |              |
| > 40 mm                      | 6(30%)         | 1(33.3%) |              | 5(62.5%) | 2(13.3%)  |              | 7(63.6%) | 0(0%)     |              | 5(71.4%) | 0(0%)    |              |
| <b>Amyloid</b>               |                |          |              |          |           |              |          |           |              |          |          |              |
| Present                      | 12(60%)        | 1(33.3%) | 0.560        | 6(75%)   | 7(46.7%)  | 0.379        | 9(81.8%) | 4(33.3%)  | <b>0.036</b> | 6(85.7%) | 3(37.5%) | 0.119        |
| Absent                       | 8(40%)         | 2(66.7%) |              | 2(25%)   | 8(53.3%)  |              | 2(18.2%) | 8(66.7%)  |              | 1(14.3%) | 5(62.5%) |              |
| <b>pT category</b>           |                |          |              |          |           |              |          |           |              |          |          |              |
| T1                           | 12(60%)        | 2(66.7%) | 1.000        | 2(25%)   | 12(80%)   | <b>0.025</b> | 3(27.3%) | 11(91.7%) | <b>0.001</b> | 1(14.3%) | 7(87.5%) | <b>0.005</b> |
| T2                           | 2(10%)         | 0(0%)    |              | 1(12.5%) | 1(6.7%)   |              | 1(9.1%)  | 1(8.3%)   |              | 1(14.3%) | 1(12.5%) |              |
| T3                           | 5(25%)         | 1(33.3%) |              | 4(50%)   | 2(13.3%)  |              | 6(54.5%) | 0(0%)     |              | 4(57.1%) | 0(0%)    |              |
| T4                           | 1(5%)          | 0(0%)    |              | 1(12.5%) | 0(0%)     |              | 1(9.1%)  | 0(0%)     |              | 1(14.3%) | 0(0%)    |              |
| <b>AJCC stage</b>            |                |          |              |          |           |              |          |           |              |          |          |              |
| I                            | 11(55%)        | 2(66.7%) | 0.618        | 2(25%)   | 11(73.3%) | <b>0.044</b> | 2(18.2%) | 11(91.7%) | <b>0.000</b> | 0(0%)    | 7(87.5%) | <b>0.000</b> |
| II                           | 2(10%)         | 1(33.3%) |              | 1(12.5%) | 2(13.3%)  |              | 2(18.2%) | 1(8.3%)   |              | 0(0%)    | 1(12.5%) |              |
| III                          | 2(10%)         | 0(0%)    |              | 1(12.5%) | 1(6.7%)   |              | 2(18.2%) | 0(0%)     |              | 2(28.6%) | 0(0%)    |              |
| IV                           | 5(25%)         | 0(0%)    |              | 4(50%)   | 1(6.7%)   |              | 5(45.5%) | 0(0%)     |              | 5(71.4%) | 0(0%)    |              |

\*p-value <0.05 was considered to be statistically significant

Abbreviations: LVI, lymphovascular invasion; LNM, lymph node metastasis; mETE, microscopic extrathyroidal extension; P, present; A, absent; U, unifocal; M, multifocal; #, number of cases.

**Table S2.** Pathological characteristics of TCTs' PTC components in relation to the histopathological prognostic features

| Pathological characteristics        | Focality of the tumor |          | p-value      | mETE     |         | p-value      | LVI      |         | p-value      |
|-------------------------------------|-----------------------|----------|--------------|----------|---------|--------------|----------|---------|--------------|
|                                     | U (#17)               | M (#6)   |              | P (#3)   | A (#20) |              | P (#3)   | A (#20) |              |
| <b>Tumor size (mm)</b>              |                       |          |              |          |         |              |          |         |              |
| < 10 mm                             | 16(94.1%)             | 4(66.7%) | 0.155        | 1(33.3%) | 19(95%) | <b>0.034</b> | 1(33.3%) | 19(95%) | <b>0.034</b> |
| 10 - 40 mm                          | 1(5.9%)               | 2(33.3%) |              | 2(66.7%) | 1(5%)   |              | 2(66.7%) | 1(5%)   |              |
| <b>Growth pattern</b>               |                       |          |              |          |         |              |          |         |              |
| Conventional                        | 11(64.7%)             | 0(0%)    | <b>0.014</b> | 2(66.7%) | 9(45%)  | 0.59         | 2(66.7%) | 9(45%)  | 0.590        |
| Follicular                          | 6(35.3%)              | 6(100%)  |              | 1(33.3%) | 11(55%) |              | 1(33.3%) | 11(55%) |              |
| <b>pT category</b>                  |                       |          |              |          |         |              |          |         |              |
| T1                                  | 16(94.1%)             | 4(66.7%) | 0.155        | 1(33.3%) | 19(95%) | <b>0.034</b> | 1(33.3%) | 19(95%) | <b>0.034</b> |
| T2                                  | 1(5.9%)               | 2(33.3%) |              | 2(66.7%) | 1(5%)   |              | 2(66.7%) | 1(5%)   |              |
| <b>AJCC stage</b>                   |                       |          |              |          |         |              |          |         |              |
| I                                   | 17(100%)              | 4(66.7%) | 0.059        | 2(66.7%) | 19(95%) | 0.249        | 2(66.7%) | 19(95%) | 0.249        |
| II                                  | 0(0%)                 | 2(33.3%) |              | 1(33.3%) | 1(5%)   |              | 1(33.3%) | 1(5%)   |              |
| <b>Coexisting thyroid pathology</b> |                       |          |              |          |         |              |          |         |              |
| Colloid goiter                      | 10(58.8%)             | 4(66.7%) | 0.100        | 2(66.7%) | 12(60%) | 1.000        | 1(33.3%) | 13(65%) | 0.190        |
| Nodular goiter                      | 6(35.3%)              | 0(0%)    |              | 1(33.3%) | 5(25%)  |              | 2(66.7%) | 4(20%)  |              |
| Hashimoto thyroiditis               | 1(5.9%)               | 2(33.3%) |              | 0(0%)    | 3(15%)  |              | 0(0%)    | 3(15%)  |              |

\*p-value <0.05 was considered to be statistically significant

Abbreviations: RTL right thyroid lobe, LTL left thyroid lobe, LVI lymphovascular invasion, mETE microscopic extrathyroidal extension, P present, A absent, U unifocal, M multifocal, # - number of cases.

**Table S3.** Pathological characteristics of PTC-only tumors in relation to the histopathological prognostic features

| Pathological characteristics | Focality of the tumor |          | p-value | LVI      |           | p-value      |
|------------------------------|-----------------------|----------|---------|----------|-----------|--------------|
|                              | U (#15)               | M (#8)   |         | P (#6)   | A (#17)   |              |
| <b>Age at diagnosis</b>      |                       |          |         |          |           |              |
| <55 yo                       | 4(26.7%)              | 2(25%)   | 1.000   | 4(66.7%) | 2(11.8%)  | <b>0.021</b> |
| >55 yo                       | 11(73.3%)             | 6(75%)   |         | 2(33.3%) | 15(88.2%) |              |
| <b>Sex</b>                   |                       |          |         |          |           |              |
| Male                         | 0(0%)                 | 2(25%)   | 0.111   | 1(16.7%) | 1(5.9%)   | 0.462        |
| Female                       | 15(100%)              | 6(75%)   |         | 5(83.3%) | 16(94.1%) |              |
| <b>Tumor size (mm)</b>       |                       |          |         |          |           |              |
| < 10 mm                      | 13(86.7%)             | 6(75%)   | 0.589   | 2(33.3%) | 17(100%)  | <b>0.002</b> |
| 10 - 40 mm                   | 2(13.3%)              | 2(25%)   |         | 4(66.7%) | 0(0%)     |              |
| <b>Thyroid location</b>      |                       |          |         |          |           |              |
| RTL                          | 9(60%)                | 3(37.5%) | 0.360   | 3(50%)   | 9(52.9%)  | 1.000        |
| LTL                          | 6(40%)                | 4(50%)   |         | 3(50%)   | 7(41.2%)  |              |
| Isthmus                      | 0(0%)                 | 1(12.5%) |         | 0(0%)    | 1(5.9%)   |              |
| <b>Growth pattern</b>        |                       |          |         |          |           |              |
| Conventional                 | 8(53.3%)              | 6(75%)   | 0.400   | 6(100%)  | 8(47.1%)  | <b>0.048</b> |
| Follicular                   | 7(46.7%)              | 2(25%)   |         | 0(0%)    | 9(52.9%)  |              |
| <b>pT category</b>           |                       |          |         |          |           |              |
| T1                           | 14(93.3%)             | 6(75%)   | 0.269   | 3(50%)   | 17(100%)  | <b>0.011</b> |
| T2                           | 1(6.7%)               | 2(25%)   |         | 3(50%)   | 0(0%)     |              |

\*p-value <0.05 was considered to be statistically significant

Abbreviations: RTL right thyroid lobe, LTL left thyroid lobe, LVI lymphovascular invasion, P present, A absent, U unifocal, M multifocal, # - number of cases.

**Table S4.** Pathological characteristics of the TCTs' PTC component compared to PTC-only tumors

|                                                    |          | Mean value | t-test value | degrees of freedom (df) | p-value |
|----------------------------------------------------|----------|------------|--------------|-------------------------|---------|
| <b>Age at diagnosis (years)</b>                    | PTCc     | 61.700     | 0.748        | 44.000                  | 0.458   |
|                                                    | PTC-only | 59.740     |              |                         |         |
| <b>Sex (M/F)</b>                                   | PTCc     | 1.300      | 1.890        | 36.466                  | 0.67    |
|                                                    | PTC-only | 1.090      |              |                         |         |
| <b>Diameter (mm)</b>                               | PTCc     | 6.174      | -0.889       | 44.000                  | 0.379   |
|                                                    | PTC-only | 8.483      |              |                         |         |
| <b>Thyroid site (LTL/RTL/Isthmus)</b>              | PTCc     | 2.430      | -0.222       | 44.000                  | 0.825   |
|                                                    | PTC-only | 2.480      |              |                         |         |
| <b>Growth pattern (Conventional/Follicular)</b>    | PTCc     | 1.520      | 0.876        | 44.000                  | 0.386   |
|                                                    | PTC-only | 1.390      |              |                         |         |
| <b>Focality of the tumor (Unifocal/Multifocal)</b> | PTCc     | 1.740      | 0.630        | 44.000                  | 0.532   |
|                                                    | PTC-only | 1.650      |              |                         |         |
| <b>mETE (Present/Absent)</b>                       | PTCc     | 1.130      | 1.817        | 22.000                  | 0.083   |
|                                                    | PTC-only | 1.000      |              |                         |         |
| <b>LVI (Present/Absent)</b>                        | PTCc     | 1.130      | -1.106       | 41.229                  | 0.275   |
|                                                    | PTC-only | 1.260      |              |                         |         |
| <b>PNI (Present/Absent)</b>                        | PTCc     | 1.040      | 0.000        | 44.000                  | 1.000   |
|                                                    | PTC-only | 1.040      |              |                         |         |
| <b>Lymph node metastasis (Present/Absent)</b>      | PTCc     | 1.200      | -0.765       | 25.000                  | 0.452   |
|                                                    | PTC-only | 1.330      |              |                         |         |
| <b>pathologic T category (T1/T2)</b>               | PTCc     | 1.130      | 0.000        | 44.000                  | 1.000   |

|                   |          |       |       |        |       |
|-------------------|----------|-------|-------|--------|-------|
|                   | PTC-only | 1.130 |       |        |       |
| AJCC stage (I/II) | PTCc     | 1.090 | 0.000 | 44.000 | 1.000 |
|                   | PTC-only | 1.090 |       |        |       |

\*p-value <0.05 was considered to be statistically significant

Abbreviations: M male, F female, LTL left thyroid lobe, RTL right thyroid lobe, mETE microscopic extrathyroidal extension, LVI lymphovascular invasion, PNI perineural invasion, PTCc papillary thyroid carcinoma component, PTC-only papillary thyroid carcinoma-only.
